# Supplementary material for: ERBB2 amplification in gastric cancer: a genomic insight into ethnic disparities
Source: PubMed Central journal article supplement — J Natl Cancer Inst. 2024 Jul 11;116(11):1830–3. doi: 10.1093/jnci/djae147 (PMC11542984; doi:10.1093/jnci/djae147), 2024-07-11
Supplement: djae147_supplementary_data.pdf [file djae147_supplementary_data.pdf]

**SUPPLEMENTARY MATERIALS**

**Supplementary Table 1.** Patient demographics and somatic gene alteration patterns by race and ethnicity.

|                                                | <b>NH White</b><br>N=611 | <b>Hispanic</b><br>N=159 | <b>NH Asian</b><br>N=154 | <b>NH Black</b><br>N=95 | <b>P-value*</b>  |
|------------------------------------------------|--------------------------|--------------------------|--------------------------|-------------------------|------------------|
| <b>Sex: Male</b>                               | 59.7% (365/611)          | 54.1% (86/159)           | 50.6% (78/154)           | 55.8% (53/95)           | 0.17             |
| <b>Sequencing age:<br/>Years, median [IQR]</b> | 64 [54;72]               | 58 [47;67]               | 59 [51;71]               | 62 [52;71]              | <b>&lt;0.001</b> |
| <b>Early-onset**</b>                           | 16.4% (100/611)          | 32.1% (51/159)           | 23.4% (36/154)           | 17.9% (17/95)           | <b>&lt;0.001</b> |
| <b>Genes:</b>                                  |                          |                          |                          |                         |                  |
| <b>ΔTP53</b>                                   | 54.2% (324/598)          | 47.8% (76/159)           | 59.7% (92/154)           | 57.8% (52/90)           | 0.150            |
| <b>ΔARID1A</b>                                 | 20.2% (119/588)          | 20.7% (23/111)           | 17.6% (27/153)           | 19.0% (16/84)           | 0.346            |
| <b>ΔCDH1</b>                                   | 21.6% (127/587)          | 16.7% (19/114)           | 19.5% (30/154)           | 24.4% (21/86)           | 0.497            |
| <b>ΔKMT2D</b>                                  | 12.9% (75/583)           | 18.2% (20/110)           | 11.8% (18/153)           | 16.0% (13/81)           | 0.333            |
| <b>ΔPIK3CA</b>                                 | 11.0% (66/598)           | 12.6% (20/159)           | 5.2% (8/154)             | 14.4% (13/90)           | 0.051            |
| <b>ΔKRAS</b>                                   | 11.2% (67/598)           | 10.1% (16/158)           | 5.8% (9/154)             | 5.6% (5/90)             | 0.086            |
| <b><i>ERBB2:AMP</i></b>                        | <b>9.8% (53/543)</b>     | <b>13.9% (14/101)</b>    | <b>8.1% (11/136)</b>     | <b>11.0% (9/82)</b>     | <b>&lt;0.001</b> |
| <b>ΔAPC</b>                                    | 9.0% (53/591)            | 3.4% (4/116)             | 6.5% (10/154)            | 10.3% (9/87)            | 0.173            |
| <b><i>CCNE1:AMP</i></b>                        | 8.4% (46/543)            | 4.0% (4/101)             | 3.7% (5/136)             | 15.9% (13/82)           | <b>&lt;0.001</b> |
| <b>ΔATM</b>                                    | 7.6% (45/591)            | 9.6% (11/115)            | 6.5% (10/154)            | 7.9% (7/89)             | 0.830            |
| <b>ΔERBB4</b>                                  | 7.1% (42/593)            | 5.2% (6/115)             | 5.8% (9/154)             | 5.6% (5/89)             | 0.882            |
| <b>ΔERBB3</b>                                  | 7.3% (43/589)            | 4.5% (7/155)             | 5.2% (8/153)             | 4.8% (4/84)             | 0.658†           |
| <b>ΔNOTCH1</b>                                 | 7.4% (44/595)            | 5.2% (6/116)             | 5.8% (9/154)             | 5.6% (5/90)             | 0.795            |
| <b>ΔBRCA2</b>                                  | 7.2% (42/587)            | 4.5% (5/111)             | 8.5% (13/153)            | 10.7% (9/84)            | 0.383            |
| <b>ΔSMARCA4</b>                                | 7.0% (41/583)            | 9.0% (10/111)            | 5.2% (8/153)             | 8.4% (7/83)             | 0.602            |

|                              |                 |                |                |                |                  |
|------------------------------|-----------------|----------------|----------------|----------------|------------------|
| <b>ΔARID1B</b>               | 7.4% (42/569)   | 7.5% (8/107)   | 4.0% (6/151)   | 4.2% (3/72)    | 0.420†           |
| <b>ΔSMAD4</b>                | 5.7% (34/597)   | 8.5% (10/117)  | 6.5% (10/154)  | 3.3% (3/90)    | 0.468†           |
| <b>ΔGNAS</b>                 | 4.8% (29/598)   | 2.5% (4/157)   | 2.6% (4/154)   | 3.3% (3/90)    | 0.471†           |
| <b>ΔCDKN2A</b>               | 4.2% (25/598)   | 2.5% (4/158)   | 1.3% (2/154)   | 1.1% (1/90)    | 0.196†           |
| <b>ΔPBRM1</b>                | 6.0% (34/568)   | 0.9% (1/110)   | 6.5% (10/153)  | 5.1% (4/79)    | 0.110†           |
| <b>Sequencing Center***:</b> |                 |                |                |                |                  |
| <b>MSK</b>                   | 59.4% (349/588) | 13.6% (80/588) | 19.0%(112/588) | 8.0% (47/588)  | <b>&lt;0.001</b> |
| <b>DFCI</b>                  | 74.5% (196/263) | 7.6% (20/263)  | 9.9% (26/263)  | 8.0% (21/263)  |                  |
| <b>Other</b>                 | 39.3% (66/168)  | 35.1% (59/168) | 9.5% (16/168)  | 16.1% (27/168) |                  |

NH, non-Hispanic; N, number; AMP, amplification; Δ, non-silent mutation; MSK, Memorial Sloan Kettering; DFCI, Dana Farber Cancer Institute.

\*Bold indicates P-value < 0.05.

\*\*Early-onset gastric cancer is defined as individuals age < 50 years at sequencing.

\*\*\*Other sequencing centers include: Herbert Irving Comprehensive Cancer Center, Columbia University (n=5), Duke Cancer Institute (n=27), Johns Hopkins Sidney Kimmel Comprehensive Cancer Center (n=12), The University of Texas MD Anderson Cancer Center (n=5), Providence Health & Services Cancer Institute (n=1), Swedish Cancer Institute (n=2), University of California-San Francisco (UCSF Helen Diller Family Comprehensive Cancer Center) (n=22), Vall D'Hebron Institute of Oncology (n=50), Vanderbilt-Ingram Cancer Center (n=24), Wake Forest University Health Sciences, Wake Forest Baptist Medical Center (n=12), and Yale (n=8).

† The Fisher's exact test was conducted; otherwise, the chi-square test was performed.

**Supplementary Table 2.** Driver alteration patterns by race and ethnicity\*.

| <b>Genes:</b>   | <b>NH White</b><br>N=611 | <b>NH Asian</b><br>N=154 | <b>Hispanic</b><br>N=159 | <b>NH Black</b><br>N=95 | <b>P-value</b> |
|-----------------|--------------------------|--------------------------|--------------------------|-------------------------|----------------|
| <b>ΔTP53</b>    | 54.4% (322/592)          | 59.7% (92/154)           | 47.2% (75/159)           | 58% (51/88)             | 0.135          |
| <b>ΔARID1A</b>  | 19.3% (109/564)          | 13.7% (21/153)           | 15.1% (23/152)           | 18.8% (15/80)           | 0.330          |
| <b>ΔCDH1</b>    | 12.2% (70/572)           | 9.2% (14/153)            | 10.1% (11/109)           | 15.9% (13/82)           | 0.434          |
| <b>ΔKMT2D</b>   | 8.5% (47/555)            | 6.8% (10/147)            | 11.7% (12/103)           | 10.4% (8/77)            | 0.552          |
| <b>ΔPIK3CA</b>  | 10.7% (61/570)           | 4.6% (7/153)             | 11.6% (17/147)           | 14% (12/86)             | 0.069          |
| <b>ΔKRAS</b>    | 11.7% (67/571)           | 5.8% (9/154)             | 11% (16/146)             | 5.8% (5/86)             | 0.086          |
| <b>ΔAPC</b>     | 8% (43/538)              | 5.2% (7/134)             | 3% (3/100)               | 5.6% (4/72)             | 0.278†         |
| <b>ΔATM</b>     | 4.8% (26/546)            | 5% (7/140)               | 3.7% (4/107)             | 5.3% (4/75)             | 0.945†         |
| <b>ΔERBB4</b>   | 1.1% (6/566)             | 1.3% (2/152)             | 0% (0/103)               | 0% (0/76)               | 0.714†         |
| <b>ΔERBB3</b>   | 4.1% (23/559)            | 4.2% (6/144)             | 3.5% (5/142)             | 1.4% (1/71)             | 0.809†         |
| <b>ΔNOTCH1</b>  | 1.5% (8/531)             | 0% (0/140)               | 0% (0/100)               | 4.2% (3/71)             | 0.051†         |
| <b>ΔBRCA2</b>   | 4.1% (22/539)            | 2.9% (4/140)             | 2% (2/100)               | 4% (3/75)               | 0.801†         |
| <b>ΔSMARCA4</b> | 3.4% (18/535)            | 2.1% (3/140)             | 8% (8/100)               | 4.1% (3/73)             | 0.124†         |
| <b>ΔARID1B</b>  | 3% (17/558)              | 2.1% (3/145)             | 5.9% (6/101)             | 2.8% (2/71)             | 0.392†         |
| <b>ΔSMAD4</b>   | 5.6% (31/556)            | 6% (9/150)               | 8.8% (9/102)             | 4.1% (3/73)             | 0.562†         |
| <b>ΔGNAS</b>    | 4.3% (24/552)            | 2% (3/147)               | 2.7% (4/146)             | 1.3% (1/76)             | 0.433†         |
| <b>ΔCDKN2A</b>  | 6.2% (20/324)            | 1.3% (1/78)              | 2.8% (3/107)             | 2.3% (1/44)             | 0.209†         |
| <b>ΔPBRM1</b>   | 4% (21/530)              | 5.7% (8/140)             | 1% (1/100)               | 2.8% (2/71)             | 0.300†         |

NH, non-Hispanic; N, number; AMP, amplification;  $\Delta$ , non-silent mutation.

\*Driver alterations were included as oncogenic/likely oncogenic/resistance in OncoKB, or pathogenic/likely pathogenic in ClinVar.

† The Fisher's exact test was conducted; otherwise, the chi-square test was performed.

**Supplementary Table 3.** Stratified analyses by sequencing age of *ERBB2* amplification patterns by race/ethnicity:  
GENIE v15.

| Sequencing age                     | NH White       | NH Asian     | Hispanic      | NH Black     | P-value*         |
|------------------------------------|----------------|--------------|---------------|--------------|------------------|
| <b>Early-onset (&lt; 50 years)</b> | 6.5% (6/93)    | 6.3% (2/32)  | 8.3% (3/36)   | 7.7% (1/13)  | <b>0.013</b> †   |
| <b>Late-onset (50+ years)</b>      | 10.4% (47/450) | 8.7% (9/104) | 16.9% (11/65) | 11.6% (8/69) | <b>&lt;0.001</b> |

NH, non-Hispanic; N, number; AMP, amplification.

\*Fisher's exact test. Bold indicates P-value < 0.05.

† The Fisher's exact test was conducted; otherwise, the chi-square test was performed.

**Supplementary Table 4.** Multivariate logistic regression models for *ERBB2* amplification: GENIE v15.

|                       | <b>Gastric adenocarcinoma patients<br/>(n=1019)</b> |                  |
|-----------------------|-----------------------------------------------------|------------------|
| <b>Race/Ethnicity</b> | <b>OR (95% CI)</b>                                  | <b><i>P</i>*</b> |
| NH White              | Ref                                                 |                  |
| Hispanic              | <b>2.52 (1.20-5.33)</b>                             | <b>0.02</b>      |
| NH Black              | 0.84 (0.34-2.11)                                    | 0.72             |
| NH Asian              | 0.86 (0.39-1.88)                                    | 0.70             |

NH, non-Hispanic; N, number; AMP, amplification.

Multivariable logistic regression analyses were adjusted for age, sex, histological subtype, and sequencing center.

\*Bold indicates P-value < 0.05
